# Supplementary material
Source: Springer Nature journal article supplement (https://www.springermedizin.de/resource/supplementary/12889_2011_3478_MOESM1_ESM.pdf/9489090)

## Pilot Phase

## 1<sup>st</sup> Year Rollout

## 2<sup>nd</sup> Year Rollout

June 2007

June 2008

June 2009

**Age 40-69**

Central counties

Tyrol

Tyrol

**Age 50-59**

Central counties

Tyrol

Tyrol

**Age 60-69**

Central counties

Tyrol except  
central counties

Central counties

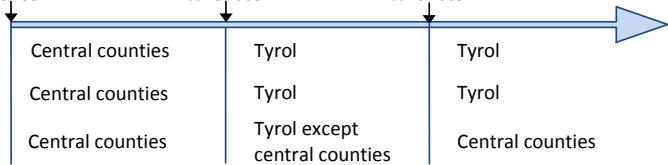

Supplement: MOESM1 [file 9489090]
